# Supplementary material for: Genome-scale metabolic modeling reveals increased reliance on valine catabolism in clinical isolates of Klebsiella pneumoniae
Source: PubMed Central journal article supplement (PMC9616910; doi:10.1038/s41540-022-00252-7), 2022-10-28
Supplement: 41540_2022_252_MOESM1_ESM.pdf [file 41540_2022_252_MOESM1_ESM.pdf]

## Supplementary Materials

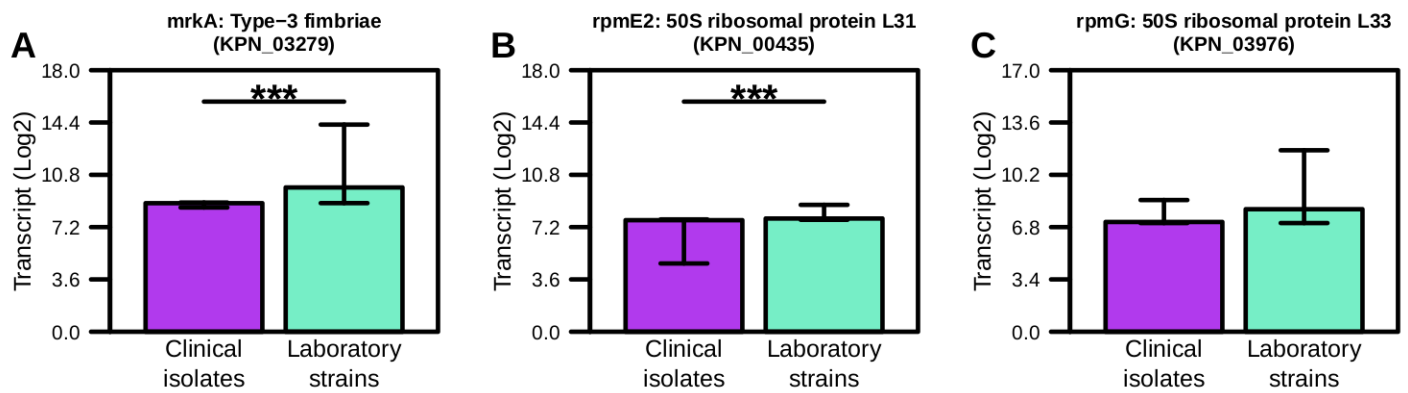

**Supplementary Figure 1) Additional differentially expressed genes from Figure 1.** Median and interquartile ranges from pooled analysis between clinical and laboratory isolate transcriptomes. Significant differences determined by Wilcoxon rank-sum test with Benjamini-Hochberg correction (\*\*\*)  $p$ -value  $\leq 0.001$ .

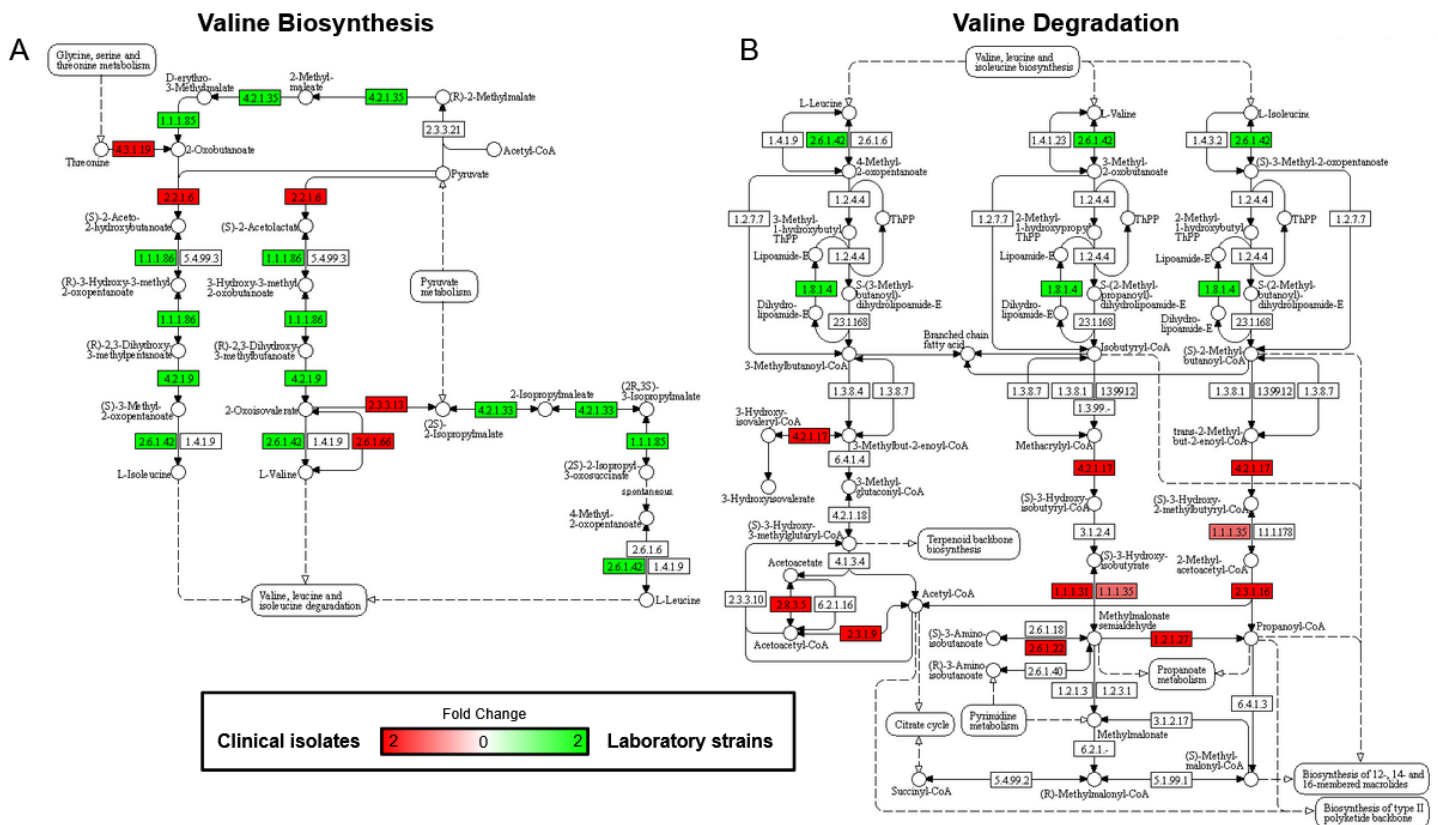

**Supplementary Figure 2 | Differential expression of valine biosynthesis and degradation pathways.** Fold change differential expression analysis across all analyzed transcriptomes in pathways associated with both

KEGG Valine **(A)** Biosynthesis or **(B)** Degradation. Red represents areas of the pathway that are more highly transcribed in clinical isolates, and green represents areas that are more highly transcribed in laboratory strains.

**Supplementary Table 1 | *K. pneumoniae* transcriptomic dataset metadata**

**Supplementary Table 2 | Differential expression analysis summary statistics**

**Supplementary Table 3 | Complete gene and reaction essentiality results**

**Supplementary Table 4 | Valine-associated reaction net import flux quantification**

**Supplementary Table 5 | Flux analysis summary table**

**Supplementary Table 6 | RNA-Seq mapping summary table**
